# Supplementary material for: The miRNA-21-5p Payload in Exosomes from M2 Macrophages Drives Tumor Cell Aggression via PTEN/Akt Signaling in Renal Cell Carcinoma
Source: MDPI journal article supplement (doi:10.3390/ijms23063005), 2022-03-10
Supplement: s1 [file s1]

**Table S1.** Sequences of primers

| Gene           | Primer    | Sequence                                                      |
|----------------|-----------|---------------------------------------------------------------|
| CD163          | F         | TTTGTCAACTTGAGTCCCTTCAC                                       |
|                | R         | TCCCCTACACTTGTTTTAC                                           |
| CD206          | F         | GGGTTGCTATCACTCTCTATGC                                        |
|                | R         | TTTCTTGTCTGTTGCCGTAGTT                                        |
| HLA-DR         | F         | GCCTCTTCTCAAGCACTGGGA                                         |
|                | R         | CCACCAGACCCACAGTCAGG                                          |
| TNF- $\alpha$  | F         | CCTGTAGCCACGTCGTAGC                                           |
|                | R         | AGCAATGACTCCAAAGTAGACC                                        |
| GAPDH          | F         | GGAGCGAGATCCCTCCAAAAT                                         |
|                | R         | GGCTGTTGTCATACTTCTCATGG                                       |
| Vimentin       | F         | TCCAAGTTTGCTGACCTCTC                                          |
|                | R         | TCAACGGCAAAGTTCTCTTC                                          |
| MMP-9          | F         | TCGAAGTTTGACAGCGACAAG                                         |
|                | R         | TCAGGGCGAGGACCATAGAGG                                         |
| PTEN           | F         | ACGACGGGAAGACAAGTTCA                                          |
|                | R         | AGGTTTCCTCTGGTCCTGGT                                          |
| PTEN-3'UTR WT  | F         | TCGAGCTACCCCTTTGCACTTGTGGCAAC<br>AGATAAGTTTGACAGTTGGCTAAGAGGC |
|                | R         | GGCCGCCTCTTAGCCAACTGCAAACCTAT<br>CTGTTGCCACAAGTGCAAAGGGGTAGGC |
| PTEN-3'UTR Mut | F         | TCGAGCTACCCCTTTGCACTTGTGGCAAC<br>AGTTTACTTTGACAGTTGGCTAAGAGGC |
|                | R         | GGCCGCCTCTTAGCCAACTGCAAAGTAAA<br>CTGTTGCCACAAGTGCAAAGGGGTAGGC |
| miR-21-5p      | Stem-loop | GTCGTATCCAGTGCAGGGTCCGAGGTATT<br>CGCACTGGATACGACTCAACA        |
|                | F         | GCACCTAGCTTATCAGACTGA                                         |
|                | R         | GTGCAGGGTCCGAGGT                                              |
| miR-155-5p     | Stem-loop | CTCAACTGGTGTCGTGGGGCAATTCAGTT<br>GAGCCCCTATC                  |
|                | F         | TGCCTCCAAGTCACTCCTAC                                          |
|                | R         | GCGAGCACAGAATAATACGAC                                         |
| miR-210-3p     | Stem-loop | GTCGTATCCAGTGCAGGGTCCGAGGTATT<br>CGCACTGGATACGACTCAGCC        |
|                | F         | TGCTGTGCGTGTGACAG                                             |
|                | R         | GTGCAGGGTCCGAGGT                                              |
| U6             | Stem-loop | ACGCTTCACGAATTTGCGTGTC                                        |
|                | F         | TCGCTTGGCAGCACATATACT                                         |
|                | R         | ACGCTTCACGAATTTGCGTGTC                                        |

\* F: Forward primer (5'-3'); R: Reverse primer (5'-3').
