# Supplementary material for: The miRNA-21-5p Payload in Exosomes from M2 Macrophages Drives Tumor Cell Aggression via PTEN/Akt Signaling in Renal Cell Carcinoma
Source: MDPI journal article supplement (doi:10.3390/ijms23063005), 2022-03-10
Supplement: s1 [file s1]

## Caption of supplementary figures

**Figure S1.** Morphology of THP-1-M $\phi$  and THP-1-M2 cells. Scale bar, 100  $\mu$ m.

**Figure S2.** (A, B) Transwell assays of 786-O and ACHN cells treated with conditioned media derived from different macrophage subtypes. Scale bar, 100  $\mu$ m. \*  $p < 0.05$ , \*\*  $p < 0.01$ , \*\*\*  $p < 0.001$ , \*\*\*\*  $p < 0.0001$ . M $\phi$ -CM: media conditioned by THP-1-M $\phi$  cells; M2-CM: media conditioned by THP-1-M2 cells.

**Figure S3.** The gross view (right) of CAM tumors (left) and three representative tumors in each group are shown.
